# Supplementary material for: Mimicking the bioelectrocatalytic function of recombinant CotA laccase through electrostatically self-assembled bioconjugates
Source: Royal Society of Chemistry journal article supplement (doi:10.1039/c8nr06001k), 2018-12-19
Supplement: c8nr06001k1.pdf [file c8nr06001k1.pdf]

## Electronic Supplementary Information

### Mimicking the bioelectrocatalytic function of recombinant CotA laccase through electrostatically self-assembled bioconjugates

David Alba-Molina,<sup>a</sup> Daily Rodríguez-Padrón,<sup>b</sup> Alain R. Puente-Santiago,<sup>b\*</sup> Juan J. Giner-Casares,<sup>a</sup> María T. Martín-Romero,<sup>a</sup> Luis Camacho,<sup>a</sup> Lúcia O. Martins,<sup>c</sup> Mario J. Muñoz-Batista,<sup>b</sup> Manuel Cano<sup>a\*</sup> and Rafael Luqueb,<sup>b,d\*</sup>

#### Experimental Part

##### Production of the recombinant CotA Laccase (CotALac)

Recombinant CotA Laccase from *Bacillus subtilis* was produced using a previously described protocol <sup>1,2</sup> Briefly, pLOM10 plasmid encoding the CotA-laccase gene was transformed into *Escherichia coli* Tuner (DE3) pLacI strain (Novagen) and cells were grown in Luria-Bertani medium supplemented with ampicillin (100 µg mL<sup>-1</sup>) at 37 °C. Gene expression was induced at OD<sub>600nm</sub>≈0.6 with 0.1 mM isopropyl-D-thiogalactopyranoside, at that time 0.25 mM CuCl<sub>2</sub> was added for full copper loaded protein production and growth temperature was switched to 25 °C. Agitation was stopped after 4 h and cells were harvested by centrifugation after 24 h of growth. Cells were disrupted using a French-Press apparatus and purification was performed using a two-step protocol with a cationic-exchange SP-Sepharose followed by a Superdex-200 size-exclusion column. Purified enzyme was stored at -20 °C.

##### Synthesis of CotALac functionalized AuNPs

First, 15 nm and 95 nm monodisperse citrate-stabilized gold nanoparticles (AuNPs) with a uniform quasi spherical shape and a narrow size distribution were synthesized following a kinetically controlled seeded growth strategy via the reduction of HAuCl<sub>4</sub> by sodium citrate.<sup>3</sup> Both 15 nm (step 1) and 95 nm (step 11) AuNPs, the molar gold concentration was estimated from the absorbance at 400 nm, which is assumed to have a size independent absorption coefficient.<sup>4</sup>

Next, the resulting 15 nm AuNPs (step 1) and 95 nm AuNPs (step 11) were functionalized with the CotALac enzyme by exploiting the electrostatic self-assembly of the positively charged redox enzyme on the surface of the negatively charged citrate capped AuNPs. For this, 1 mg of CotALac was dissolved in 2 mL of 50 mM sodium phosphate buffer (PBS; pH 7.0; free chloride and fluoride) solution and subsequently added to 2 mL of AuNPs solution (~0.63 mM Au). This mixture was incubated for 24 hours at 4 °C under gentle stirring. Then, both bioconjugates were collected by centrifugation at 5000 rpm for 5 min at 4 °C. The supernatant was discarded, and the pellet was resuspended in 2 mL of 50 mM PBS (pH 7.0; free chloride and fluoride) solution. The resulting bioconjugates was stored in the dark at 4 °C.

## Material characterization

The electrostatic surface potential calculations were carried out using the AMBER algorithm to generate the PQR file (PDB2PKA package) and Adaptive Poisson-Boltzmann Solver (APBS package) to generate the DX file. Color representation of the molecules was performed employing the UCSF Chimera 1.11.2 software package and considering a color range from red to blue (from -10 to 10 kT/e, respectively).

UV-visible spectra were recorded on a Cary 100 Bio UV-Vis spectrometer in disposable polystyrene cuvettes with 1.0 cm path length.

Samples for transmission electron microscopy (TEM) were prepared by drying, under ambient conditions, a dispersion of the particles on 200 mesh copper grids coated with Formvar/Carbon film. TEM images were obtained in a JEOL JEM 1400 TEM microscope, operated at an accelerating voltage of 80 kV.

Dynamic light scattering (DLS) and Zeta-potential measurements were carried out using a Malvern Zetasizer Nano ZSP ZEN5600 analyzer equipped with 10 mW laser He-Ne (633 nm). Samples were dispersed in ultrapure water and the measurements were recorded in triplicate (n = 3) at 25 °C.

Fourier-transform infrared (FTIR) spectroscopy was performed in an ALPHA-T Bruker spectrometer. Spectra were recorded at room temperature in a 4000-600  $\text{cm}^{-1}$  wavenumber range, using the OPUS software.

X-ray photoelectron spectroscopy (XPS) was carried out in a SPECS mod. PHOIBOS 150 MCD. Prior to the analysis, the sample was evacuated overnight under vacuum ( $<10^{-6}$  Torr). The experiment was accomplished at pressures  $<10^{-10}$  mbar, using a conventional X-ray source (XR-50, Specs, Mg-K $\alpha$ ,  $h\nu=1253.6$  eV,  $1 \text{ eV} = 1.603 \times 10^{-19}$  J) in a "stop and go" mode. The deconvolution of the obtained curves and element quantification was carried out using the XPS CASA program.

## Electrochemical experiments

Cyclic and linear sweep voltammetries were recorded on an AUTOLAB PGSTAT30 electrochemical analyser using a three-electrode system. ITOs (Naranjo Substrates) were used as working electrodes. A drop of 25  $\mu\text{L}$  of sample (i.e. AuNPs, CotALac@AuNPs or pristine CotALac) was loaded onto the clean surface of ITO or GC electrode and then dried overnight at 4 °C. A platinum sheet and an Ag/AgCl electrode were used as counter and reference electrodes, respectively. A 50 mM phosphate buffer solution (PBS, pH 7.0) was used as supporting electrolyte. All the solutions were purged prior to electrochemical measurements using nitrogen ( $\text{N}_2$ ) or oxygen ( $\text{O}_2$ ) gas.

## Results and discussion

**Table S1.** Particle-diameters determined by TEM and DLS measurements, and Z-potential values of the NPs under physiological conditions.

| NPs               | TEM size (nm) | Hydrodynamic size (nm) / PDI | Zeta-Potential (mV) |
|-------------------|---------------|------------------------------|---------------------|
| CotALac           | -             | 19.7 / 0.249                 | -6.9 ± 2.8          |
| 15nmAuNPs         | 14.9 ± 2.4    | 29.4 / 0.158                 | -27.4 ± 4.7         |
| CotALac@15nmAuNPs | 20.4 ± 3.2    | 63.9 / 0.264                 | -9.2 ± 6.2          |
| 95nmAuNPs         | 95.3 ± 5.1    | 110.3 / 0.173                | -30.3 ± 6.1         |
| CotALac@95nmAuNPs | 128.3 ± 8.5   | 141.2 / 0.244                | -16.8 ± 8.3         |

**Table S2.** XPS binding energy and N/Au atomic ratio.

| Sample            | Position (eV) |       |       |                      |       | N/Au (at.) |
|-------------------|---------------|-------|-------|----------------------|-------|------------|
|                   | C1s           | N1s   | O1s   | Au 4f <sub>7/2</sub> |       |            |
|                   |               |       |       | Au(0)                | Au(I) |            |
| 15nmAuNPs         | 284.6         | -     | 530.8 | 82.8                 | 84.3  | -          |
| 95nmAuNPs         | 284.6         | -     | 530.9 | 82.9                 | 84.3  | -          |
| CotALac@15nmAuNPs | 284.6         | 399.2 | 530.9 | 83.0                 | 84.5  | 7.3        |
| CotALac@95nmAuNPs | 284.6         | 399.3 | 530.8 | 82.9                 | 84.4  | 1.8        |

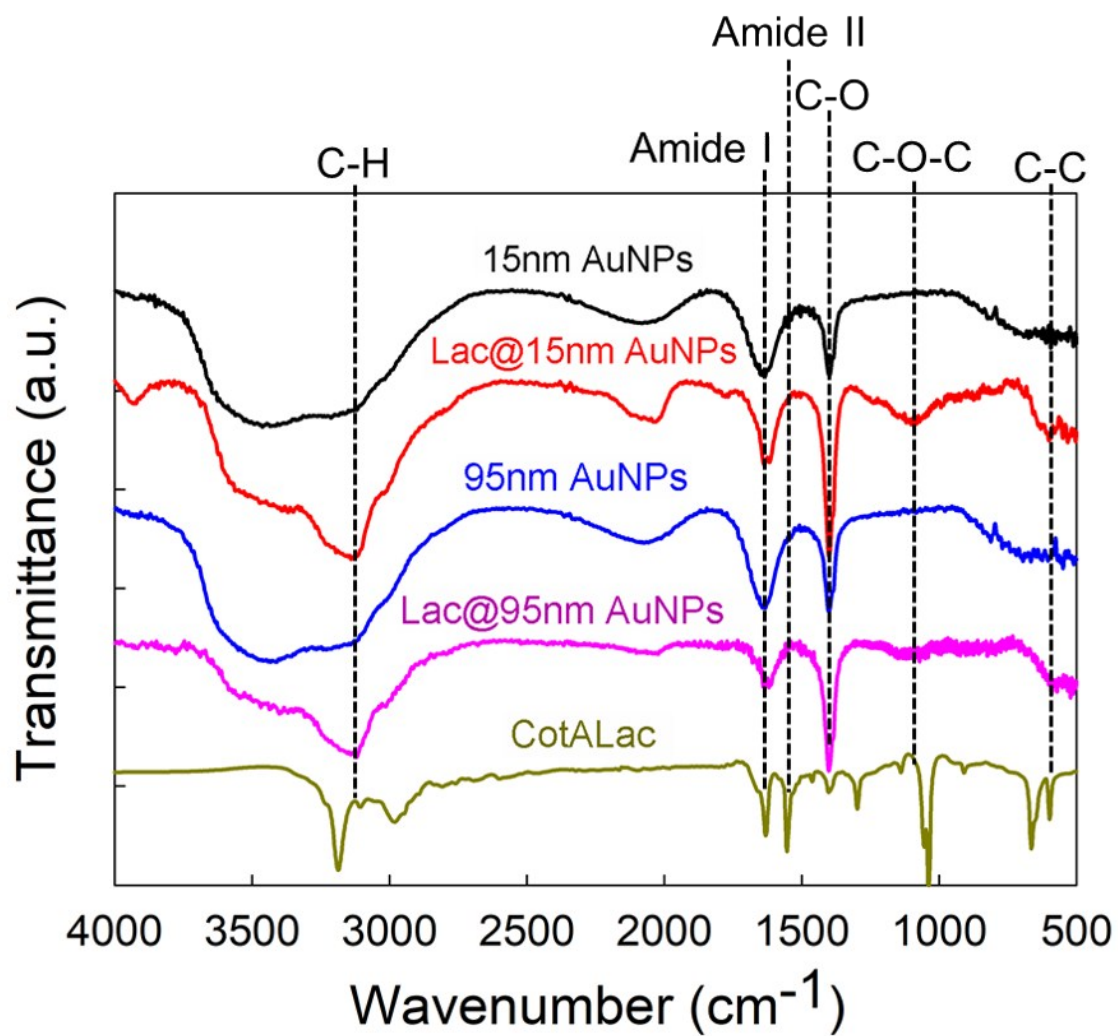

Fig. S1. FTIR spectra of 15nmAuNPs (black line), CotALac@15nmAuNPs (red line), 95nmAuNPs (blue line), CotALac@95nmAuNPs (pink line), and CotALac (dark-yellow line).

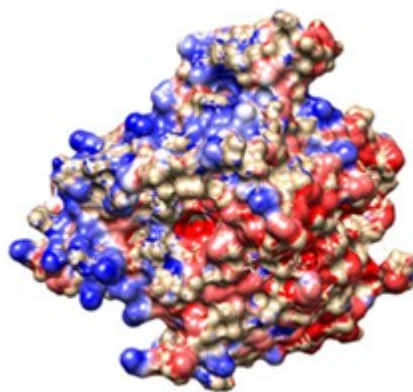

**Fig. S2.** Electrostatic surface distribution of CotALac at pH 7.0 (PDBID 4YVU) generated by the AMBER algorithm and Adaptive Poisson-Boltzmann Solver package. Blue and red areas represent the positively and negatively charged surface domains respectively.

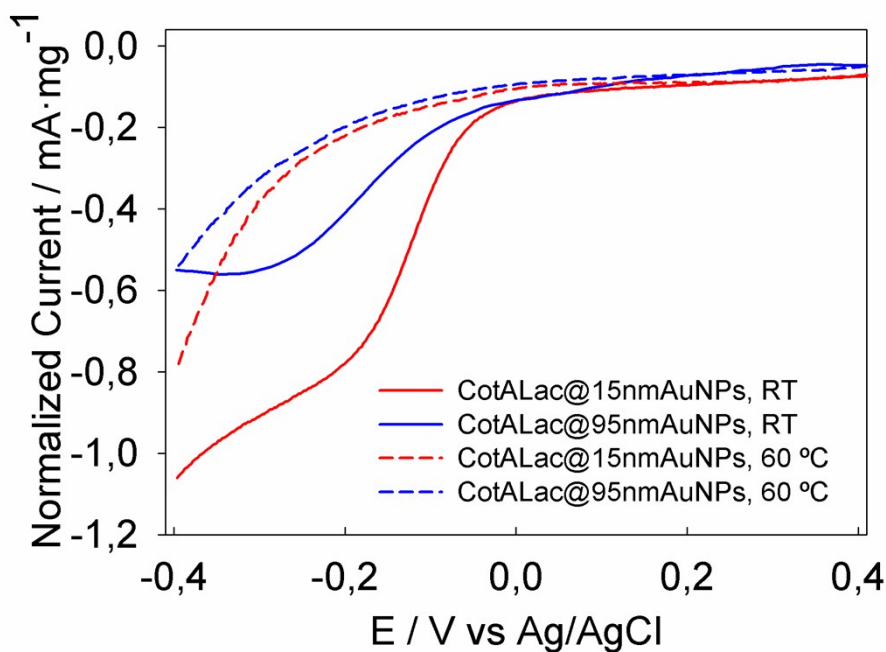

**Fig. S3** CVs of ITO modified with CotALac@15nmAuNPs and CotALac@95nmAuNPs in O<sub>2</sub>-saturated sodium phosphate buffer (50 mM, pH 7.0) at room temperature (RT) and at 60 °C. Scan rate: 100 mV·s<sup>-1</sup>.

## References

1. I. Bento, L. O. Martins, G. G. Lopes, M. A. Carrondo and P. F. Lindley, *Dalton Trans.*, 2005, 3507-3513.
2. Z. J. Chen, P. Duraó, A. T. Fernandes, P. Hildebrandt, D. H. Murgida, S. Todorovic, M. M. Pereira, E. P. Melo and L. O. Martins, *J. Biotechnol.*, 2008, **136**, S320-S320.
3. N. G. Bastus, J. Comenge and V. Puentes, *Langmuir*, 2011, **27**, 11098-11105.
4. J. Rodriguez-Fernandez, J. Perez-Juste, P. Mulvaney and L. M. Liz-Marzan, *J. Phys. Chem. B*, 2005, **109**, 14257-14261.
